# Supplementary material
Source: HighWire-hosted journal article supplement (https://oem.bmj.com/content/80/8/462)
Supplement: inline-supplementary-material-1 [file inline-supplementary-material-1.pdf]

Supplemental Table 1. Baseline characteristics and standardized differences of Veteran and matched civilian cohorts

| Variable                  | Veteran cohort 1<br>N = 31,759 | Civilian cohort 1<br>N = 127,031 | Std. diff | Veteran cohort 2<br>N = 30,675 | Civilian cohort 2<br>N = 122,688 | Std. diff | Veteran cohort 3<br>N = 30,576 | Civilian cohort 3<br>N = 122,293 | Std. diff |
|---------------------------|--------------------------------|----------------------------------|-----------|--------------------------------|----------------------------------|-----------|--------------------------------|----------------------------------|-----------|
| Age at index              | 41.8 (10.3)                    | 41.8 (10.3)                      | 0.0       | 41.9 (10.3)                    | 41.9 (10.3)                      | 0.0       | 41.9 (10.3)                    | 41.9 (10.3)                      | 0.0       |
| Person years of follow-up | 11.7 (8.2)                     | 12.9 (8.0)                       | 0.15      | 11.9 (8.1)                     | 12.7 (8.0)                       | 0.10      | 11.9 (8.1)                     | 12.8 (8.0)                       | 0.11      |
| Sex                       |                                |                                  |           |                                |                                  |           |                                |                                  |           |
| Male                      | 27,058 (85.2)                  | 108,227 (85.2)                   | 0.0       | 26,150 (85.3)                  | 104,589 (85.3)                   | 0.0       | 26,067 (85.3)                  | 104,262 (85.3)                   | 0.0       |
| Female                    | 4,701 (14.8)                   | 18,804 (14.8)                    | 0.0       | 4,525 (14.8)                   | 18,099 (14.8)                    | 0.0       | 4,509 (14.8)                   | 18,031 (14.7)                    | 0.0       |
| Income quintile           |                                |                                  |           |                                |                                  |           |                                |                                  |           |
| Missing                   | 1,183 (3.7)                    | 1,687 (1.3)                      | 0.15      | 99 (0.3)                       | 686 (0.6)                        | 0.04      | 0 (0.0)                        | 0 (0.0)                          | 0.0       |
| 1 (lowest)                | 3,358 (10.6)                   | 25,413 (20.0)                    | 0.26      | 3,358 (10.9)                   | 24,394 (19.9)                    | 0.25      | 3,358 (11.0)                   | 13,430 (11.0)                    | 0.0       |
| 2                         | 5,381 (16.9)                   | 25,071 (19.7)                    | 0.07      | 5,381 (17.5)                   | 23,621 (19.3)                    | 0.04      | 5,381 (17.6)                   | 21,522 (17.6)                    | 0.0       |
| 3                         | 6,642 (20.9)                   | 24,873 (19.6)                    | 0.03      | 6,642 (21.7)                   | 24,481 (20.0)                    | 0.04      | 6,642 (21.7)                   | 26,567 (21.7)                    | 0.0       |
| 4                         | 7,914 (24.9)                   | 25,190 (19.8)                    | 0.12      | 7,914 (25.8)                   | 24,916 (20.3)                    | 0.13      | 7,914 (25.9)                   | 31,655 (25.9)                    | 0.0       |
| 5 (highest)               | 7,281 (22.9)                   | 24,797 (19.5)                    | 0.08      | 7,281 (23.7)                   | 24,590 (20.0)                    | 0.09      | 7,281 (23.8)                   | 29,119 (23.8)                    | 0.0       |
| LHIN                      |                                |                                  |           |                                |                                  |           |                                |                                  |           |
| Missing                   | 1,084 (3.4)                    | 1,059 (0.8)                      | 0.18      | 0 (0.0)                        | 0 (0.0)                          | 0.0       | 0 (0.0)                        | 0 (0.0)                          | 0.0       |
| Erie St. Clair            | 497 (1.6)                      | 6,182 (4.9)                      | 0.19      | 497 (1.6)                      | 1,988 (1.6) 4,816 (3.9)          | 0.0       | 497 (1.6)                      | 1,996 (1.6)                      | 0.0       |
| South West                | 1,204 (3.9)                    | 8,762 (7.0)                      | 0.14      | 1,204 (3.9)                    | (3.9)                            | 0.0       | 1,199 (3.9)                    | 4,796 (3.9)                      | 0.0       |
| Waterloo - Wellington     | 463 (1.5)                      | 6,906 (5.5)                      | 0.22      | 463 (1.5)                      | 1,852 (1.5)                      | 0.0       | 462 (1.5)                      | 1,848 (1.5)                      | 0.0       |
| HNHB                      | 908 (3.0)                      | 13,055 (10.4)                    | 0.30      | 908 (3.0)                      | 3,632 (3.0)                      | 0.0       | 904 (3.0)                      | 3,616 (3.0)                      | 0.0       |
| Central West              | 228 (0.7)                      | 7,782 (6.2)                      | 0.30      | 228 (0.7)                      | 912 (0.7)                        | 0.0       | 227 (0.7)                      | 908 (0.7)                        | 0.0       |
| Mississauga-Halton        | 387 (1.3)                      | 10,910 (8.7)                     | 0.35      | 387 (1.3)                      | 1,548 (1.3)                      | 0.0       | 387 (1.3)                      | 1,548 (1.3)                      | 0.0       |
| Toronto Central           | 295 (1.0)                      | 13,113 (10.4)                    | 0.42      | 295 (1.0)                      | 1,180 (1.0)                      | 0.0       | 295 (1.0)                      | 1,180 (1.0)                      | 0.0       |
| Central                   | 622 (2.0)                      | 16,336 (13.0)                    | 0.43      | 622 (2.0)                      | 2,488 (2.0)                      | 0.0       | 621 (2.0)                      | 2,483 (2.0)                      | 0.0       |
| Central East              | 747 (2.4)                      | 14,658 (11.6)                    | 0.37      | 747 (2.4)                      | 2,988 (2.4)                      | 0.0       | 746 (2.4)                      | 2,984 (2.4)                      | 0.0       |
| South East                | 6,423 (20.9)                   | 4,382 (3.5)                      | 0.54      | 6,423 (20.9)                   | 25,690 (20.9)                    | 0.0       | 6,382 (20.9)                   | 25,523 (20.9)                    | 0.0       |
| Champlain                 | 15,249 (49.7)                  | 11,939 (9.5)                     | 0.94      | 15,249 (49.7)                  | 60,988 (49.7)                    | 0.0       | 15,215 (49.8)                  | 60,856 (49.8)                    | 0.0       |
| North Simcoe-Muskoka      | 2,380 (7.8)                    | 3,853 (3.1)                      | 0.20      | 2,380 (7.8)                    | 9,519 (7.8)                      | 0.0       | 2,374 (7.8)                    | 9,495 (7.8)                      | 0.0       |
| North East                | 1,119 (3.7)                    | 5,677 (4.5)                      | 0.05      | 1,119 (3.7)                    | 4,475 (3.7)                      | 0.0       | 1,115 (3.7)                    | 4,460 (3.6)                      | 0.0       |
| North West                | 153 (0.5)                      | 2,417 (1.9)                      | 0.13      | 153 (0.5)                      | 612 (0.5)                        | 0.0       | 152 (0.5)                      | 608 (0.5)                        | 0.0       |
| Rurality                  |                                |                                  |           |                                |                                  |           |                                |                                  |           |
| Missing                   | 1,211 (3.8)                    | 2,459 (1.9)                      | 0.11      | 127 (0.4)                      | 1,051 (0.9)                      | 0.06      | 107 (0.4)                      | 743 (0.6)                        | 0.04      |
| 1 (most urban)            | 15,396 (48.5)                  | 73,647 (58.0)                    | 0.19      | 15,396 (50.2)                  | 63,176 (51.5)                    | 0.03      | 15,350 (50.2)                  | 63,985 (52.3)                    | 0.04      |
| 2                         | 5,207 (16.4)                   | 23,968 (18.9)                    | 0.06      | 5,207 (17.0)                   | 15,465 (12.6)                    | 0.12      | 5,195 (17.0)                   | 14,732 (12.1)                    | 0.14      |

| Variable                    | Veteran cohort 1<br>N = 31,759 | Civilian cohort 1<br>N = 127,031 | Std. diff | Veteran cohort 2<br>N = 30,675 | Civilian cohort 2<br>N = 122,688 | Std. diff | Veteran cohort 3<br>N = 30,576 | Civilian cohort 3<br>N = 122,293 | Std. diff |
|-----------------------------|--------------------------------|----------------------------------|-----------|--------------------------------|----------------------------------|-----------|--------------------------------|----------------------------------|-----------|
| 3                           | 5,631 (17.7)                   | 17,740 (14.0)                    | 0.10      | 5,631 (18.4)                   | 26,218 (21.4)                    | 0.08      | 5,618 (18.4)                   | 27,216 (22.3)                    | 0.10      |
| 4                           | 4,205 (13.2)                   | 7,879 (6.2)                      | 0.24      | 4,205 (13.7)                   | 16,083 (13.1)                    | 0.02      | 4,198 (13.7)                   | 14,873 (12.2)                    | 0.05      |
| 5 (most rural)              | 109 (0.3)                      | 1,338 (1.1)                      | 0.09      | 109 (0.4)                      | 695 (0.6)                        | 0.03      | 108 (0.4)                      | 744 (0.6)                        | 0.04      |
| # major ADGs                |                                |                                  |           |                                |                                  |           |                                |                                  |           |
| 0                           | 25,423 (80.1)                  | 100,356 (79.0)                   | 0.03      | 24,402 (79.6)                  | 96,823 (78.9)                    | 0.02      | 24,327 (79.6)                  | 98,814 (80.8)                    | 0.03      |
| 1                           | 5,283 (16.6)                   | 21,272 (16.8)                    | 0.00      | 5,227 (17.0)                   | 20,785 (16.9)                    | 0.00      | 5,210 (17.0)                   | 19,393 (15.9)                    | 0.03      |
| 2+                          | 1,053 (3.3)                    | 5,403 (4.3)                      | 0.05      | 1,046 (3.4)                    | 5,080 (4.1)                      | 0.04      | 1,039 (3.4)                    | 4,086 (3.3)                      | 0.00      |
| # minor ADGs                |                                |                                  |           |                                |                                  |           |                                |                                  |           |
| 0                           | 10,465 (33.0)                  | 38,169 (30.1)                    | 0.06      | 9,699 (31.6)                   | 38,900 (31.7)                    | 0.00      | 9,659 (31.6)                   | 39,720 (32.5)                    | 0.02      |
| 1-2                         | 12,887 (40.6)                  | 48,614 (38.3)                    | 0.05      | 12,638 (41.2)                  | 49,083 (40.0)                    | 0.02      | 12,612 (41.2)                  | 49,414 (40.4)                    | 0.02      |
| 3-5                         | 7,266 (22.9)                   | 32,871 (25.9)                    | 0.07      | 7,205 (23.5)                   | 29,148 (23.8)                    | 0.01      | 7,175 (23.5)                   | 28,301 (23.1)                    | 0.01      |
| 6+                          | 1,141 (3.6)                    | 7,377 (5.8)                      | 0.10      | 1,133 (3.7)                    | 5,557 (4.5)                      | 0.04      | 1,310 (4.3)                    | 4,858 (4.0)                      | 0.01      |
| Reason for end of follow-up |                                |                                  |           |                                |                                  |           |                                |                                  |           |
| Death                       | 1,076 (3.4)                    | 6,662 (5.2)                      | -         | 1,052 (3.4)                    | 6,721 (5.5)                      | -         | 1,046 (3.4)                    | 5,590 (4.6)                      | -         |
| Loss of OHIP eligibility    | 8,481 (26.7)                   | 24,864 (19.6)                    |           | 7,578 (24.7)                   | 23,552 (19.2)                    |           | 7,519 (24.6)                   | 23,102 (18.9)                    |           |
| End of study period         | 22,202 (69.9)                  | 95,515 (75.2)                    |           | 22,045 (71.9)                  | 92,415 (75.3)                    |           | 22,011 (72.0)                  | 93,601 (76.5)                    |           |

NB: percentages may not add up to 100% due to rounding

LHIN = Local Health Integration Network; HNHB = Hamilton Niagara Haldimand Brant; ADG = Aggregated Disability Group; OHIP = Ontario Health Insurance Plan

Cohort 1 is matched on age and sex; cohort 2 on age, sex, and region of residence; and cohort 3 on age, sex, region of residence, and median neighbourhood income quintile. Cohort 3 also excludes civilians with a history of long-term care/rehabilitation stay, and/or receipt of disability/income support payments.
