# Supplementary material
Source: HighWire-hosted journal article supplement (https://oem.bmj.com/content/80/8/462)
Supplement: inline-supplementary-material-2 [file inline-supplementary-material-2.pdf]

Supplemental Table 2. Unadjusted and fully adjusted hazard ratios (HR) of an outpatient mental health encounter within the first five years of follow-up for the three cohorts, overall and at 1) three or fewer years of follow-up; and 2) four to five years of follow-up, by sex and Veteran status

| Overall (males and females combined) |                           |          |                                                                 |          |                                                                  |          |                              |          |                                                                    |          |                                                                     |          |
|--------------------------------------|---------------------------|----------|-----------------------------------------------------------------|----------|------------------------------------------------------------------|----------|------------------------------|----------|--------------------------------------------------------------------|----------|---------------------------------------------------------------------|----------|
| Cohort                               | Unadjusted (crude) models |          |                                                                 |          |                                                                  |          | Fully adjusted models        |          |                                                                    |          |                                                                     |          |
|                                      | Overall crude HR (95% CI) | <i>p</i> | Crude HR <sub>1</sub> (first three years of follow-up) (95% CI) | <i>p</i> | Crude HR <sub>2</sub> (years four to five of follow-up) (95% CI) | <i>p</i> | Overall adjusted HR (95% CI) | <i>p</i> | Adjusted HR <sub>1</sub> (first three years of follow-up) (95% CI) | <i>p</i> | Adjusted HR <sub>2</sub> (years four to five of follow-up) (95% CI) | <i>p</i> |
| Veteran 1 (ref = civilian 1)         | 1.09 (1.06-1.11)          | <0.001   | 1.11 (1.08-1.14)                                                | <0.001   | 1.00 (0.95-1.05)                                                 | 0.984    | 1.11 (1.08-1.14)             | <0.001   | 1.13 (1.10-1.17)                                                   | <0.001   | 1.03 (0.98-1.08)                                                    | 0.311    |
| Veteran 2 (ref = civilian 2)         | 1.04 (1.02-1.07)          | <0.001   | 1.05 (1.03-1.08)                                                | <0.001   | 1.00 (0.95-1.05)                                                 | 0.956    | 1.08 (1.05-1.10)             | <0.001   | 1.09 (1.06-1.11)                                                   | <0.001   | 1.04 (0.99-1.09)                                                    | 0.142    |
| Veteran 3 (ref = civilian 3)         | 1.16 (1.13-1.19)          | <0.001   | 1.21 (1.18-1.24)                                                | <0.001   | 1.01 (0.96-1.06)                                                 | 0.759    | 1.18 (1.15-1.20)             | <0.001   | 1.22 (1.19-1.25)                                                   | <0.001   | 1.02 (0.98-1.08)                                                    | 0.262    |
| Males only                           |                           |          |                                                                 |          |                                                                  |          |                              |          |                                                                    |          |                                                                     |          |
| Cohort                               | Unadjusted (crude) models |          |                                                                 |          |                                                                  |          | Fully adjusted models        |          |                                                                    |          |                                                                     |          |
|                                      | Overall crude HR (95% CI) | <i>p</i> | Crude HR <sub>1</sub> (first three years of follow-up) (95% CI) | <i>p</i> | Crude HR <sub>2</sub> (years four to five of follow-up) (95% CI) | <i>p</i> | Overall adjusted HR (95% CI) | <i>p</i> | Adjusted HR <sub>1</sub> (first three years of follow-up) (95% CI) | <i>p</i> | Adjusted HR <sub>2</sub> (years four to five of follow-up) (95% CI) | <i>p</i> |
| Veteran 1 (ref = civilian 1)         | 1.08 (1.05-1.10)          | <0.001   | 1.09 (1.06-1.12)                                                | <0.001   | 1.03 (0.97-1.08)                                                 | 0.333    | 1.10 (1.07-1.14)             | <0.001   | 1.12 (1.08-1.15)                                                   | <0.001   | 1.05 (1.00-1.11)                                                    | 0.074    |
| Veteran 2 (ref = civilian 2)         | 1.04 (1.01-1.06)          | 0.006    | 1.04 (1.01-1.07)                                                | 0.005    | 1.01 (0.96-1.07)                                                 | 0.607    | 1.06 (1.04-1.09)             | <0.001   | 1.07 (1.04-1.10)                                                   | <0.001   | 1.04 (0.99-1.10)                                                    | 0.131    |

|                                    |                                  |          |                                                                             |          |                                                                              |          |                                       |          |                                                                                    |          |                                                                                     |          |
|------------------------------------|----------------------------------|----------|-----------------------------------------------------------------------------|----------|------------------------------------------------------------------------------|----------|---------------------------------------|----------|------------------------------------------------------------------------------------|----------|-------------------------------------------------------------------------------------|----------|
| Veteran 3<br>(ref =<br>civilian 3) | 1.15 (1.12-<br>1.18)             | <0.001   | 1.19 (1.15-<br>1.22)                                                        | <0.001   | 1.03 (0.97-<br>1.08)                                                         | 0.343    | 1.16 (1.13-<br>1.18)                  | <0.001   | 1.19 (1.16-<br>1.22)                                                               | <0.001   | 1.04 (0.98-<br>1.10)                                                                | 0.184    |
| <b>Females only</b>                |                                  |          |                                                                             |          |                                                                              |          |                                       |          |                                                                                    |          |                                                                                     |          |
|                                    | <b>Unadjusted (crude) models</b> |          |                                                                             |          |                                                                              |          | <b>Fully adjusted models</b>          |          |                                                                                    |          |                                                                                     |          |
|                                    | Overall<br>crude HR<br>(95% CI)  | <i>p</i> | Crude HR <sub>1</sub><br>(first three<br>years of<br>follow-up)<br>(95% CI) | <i>p</i> | Crude HR <sub>2</sub><br>(years four<br>to five of<br>follow-up)<br>(95% CI) | <i>p</i> | Overall<br>adjusted<br>HR (95%<br>CI) | <i>p</i> | Adjusted<br>HR <sub>1</sub> (first<br>three years<br>of follow-<br>up)<br>(95% CI) | <i>p</i> | Adjusted<br>HR <sub>2</sub> (years<br>four to five<br>of follow-<br>up)<br>(95% CI) | <i>p</i> |
| Veteran 1<br>(ref =<br>civilian 1) | 1.16 (1.10-<br>1.21)             | <0.001   | 1.21 (1.15-<br>1.28)                                                        | <0.001   | 0.90 (0.79-<br>1.02)                                                         | 0.096    | 1.14 (1.07-<br>1.2)                   | <0.001   | 1.19 (1.12-<br>1.27)                                                               | <0.001   | 0.90 (0.79-<br>1.03)                                                                | 0.902    |
| Veteran 2<br>(ref =<br>civilian 2) | 1.09 (1.04-<br>1.15)             | <0.001   | 1.12 (1.08-<br>1.18)                                                        | <0.001   | 0.95 (0.84-<br>1.08)                                                         | 0.453    | 1.13 (1.08-<br>1.19)                  | <0.001   | 1.16 (1.10-<br>1.22)                                                               | <0.001   | 1.00 (0.88-<br>1.14)                                                                | 0.997    |
| Veteran 3<br>(ref =<br>civilian 3) | 1.24 (1.18-<br>1.30)             | <0.001   | 1.31 (1.24-<br>1.38)                                                        | <0.001   | 0.94 (0.82-<br>1.07)                                                         | 0.325    | 1.26 (1.20-<br>1.32)                  | <0.001   | 1.32 (1.25-<br>1.39)                                                               | <0.001   | 0.97 (0.85-<br>1.10)                                                                | 0.968    |

HR = hazard ratio; overall HR = average HR over full period of follow-up (i.e., not time-dependent); HR<sub>1</sub> = HR for first three years of follow-up; HR<sub>2</sub> = HR for years four and five

Cohort 1 is matched on age and sex; cohort 2 on age, sex, and region of residence; and cohort 3 on age, sex, region of residence, and median neighbourhood income quintile. Cohort 3 also excludes civilians with a history of long-term care/rehabilitation stay, and/or receipt of disability/income support payments.

Unadjusted models did not include any covariates; fully adjusted models included age, sex, region of residence, median neighbourhood income quintile, rurality, and number of major and minor ADGs.
